# Supplementary material for: Transcriptome Analysis Reveals Candidate Genes for Light Regulation of Elsinochrome Biosynthesis in Elsinoë arachidis
Source: MDPI journal article supplement (doi:10.3390/microorganisms12051027), 2024-05-19
Supplement: s1 [file s1]

Table S1 The information of RT-qPCR primers

| Primers | Primer sequence (5'-3') | Primers | Primer sequence (5'-3') |
|---------|-------------------------|---------|-------------------------|
| GAPDH-F | TCCACCCACGGTCAGTTC      | GAPDH-R | TCTTTCCACGGGATGTTG      |
| WC1F    | TATCGCCATCGGCACTCA      | WC1R    | CGGATTCGGAAGACTACA      |
| CRY1F   | GGCGAGTCAAGACAGATT      | CRY1R   | GAGGAGGGAGCGAAGATG      |
| CRY2F   | AAGGACGATACCGAGAAAGC    | CRY2R   | CCAGTGTCGCCTCATACCA     |
| CRY3F   | AGGCGGGCATAGAAGTCA      | CRY3R   | CGGGCTCTGCTGTAGGTT      |
| CRY4F   | GCTGCCAAGCCTACATCG      | CRY4R   | TCCTTCGCCAACTTCCAC      |
| PHY1F   | GAGGGACAAGTAGTCGTCAAGCA | PHY1R   | GATACCACTGAGCGATATGG    |
| Ops1F   | CTTCTCGGTCTGCTCCTTC     | Ops1R   | GGTGGTAACGCTCCAGTCA     |
| Ops2F   | GGGATACTTTGCCTTTGGA     | Ops2R   | GCCTCAGAGTTGGCGTGG      |
| VeAF    | CGATGAGAAGGCTTTGGG      | VeAR    | CCTTTCCGTTCTTGTCTGTG    |
| VelBF   | GACATCGGCACTCACGCTTCT   | VelBR   | TCGTCTTTCCGCCTCTGG      |
| VelCF   | TGCCCACGCTTTCCCATCT     | VelCF   | ACCCGCCTGTCTCGTTCTCC    |
| LaeAF   | GGATGTGGGACGGGTTC       | LaeAR   | TTGACGGATGTCGCTGTG      |
| VosAF   | CTCGCACCACAGCAACAC      | VosAR   | TTCATAGGCGGGCACCAG      |
| ESCB1   | ATCCGAGGTCATTGGTGATG    | ESCB1   | GAGGTTGACATCTGGCATTG    |
| ESCB2   | TTGCCAAGTTTGCCATTA      | ESCB2   | ACACTGCGTGAGCGACA       |
| ESCB3   | CTCGTATGCCTAAGATGG      | ESCB3   | AGTTCGGTGTATGAGATG      |
| ESCB4   | GCCATCGGCTTCTCCAA       | ESCB4   | CCGTGTTGCCTGCGTTC       |
| ESCB5   | CCTGACTTGAATCTTGG       | ESCB5   | GTAGCCGTATGACTCAATAG    |
| ESCB6   | GCACAAGGTTACAGCCAAGC    | ESCB6   | GAAGTCGCCAAACAGAGC      |
| ESCB7   | CTACATCAATCTTCCAATCGGTC | ESCB7   | GCAGGGCAAGTAGGATACAGAC  |
| ESCB8   | TACCGCTGATGATGAGTT      | ESCB8   | CGTCCTACACAAATACTGATTA  |
| ESCB9   | TACGATACGGCACCTCAC      | ESCB9   | CGATGACGAAGGAGAAGGA     |
| ESCB10  | CAGCGAGAACTCCACCG       | ESCB10  | ATGAGCCGAAACCGACA       |
| ESCB11  | GTCAGCCCACGAAGAAGCA     | ESCB11  | CAGCGAGGTAGCAAGCAAGT    |
| ESCB12  | TGATTCTGGTAACGATGATGT   | ESCB12  | TTGGTGGAAGATGCTGTC      |

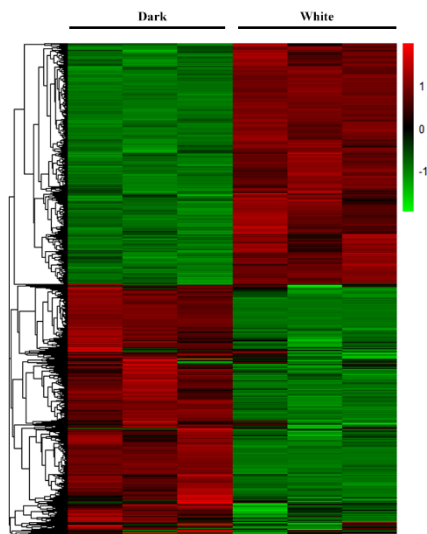

Figure S1 Cluster analysis of differentially expressed genes.
